# Supplementary material for: Arabidopsis Trichome Contains Two Plasma Membrane Domains with Different Lipid Compositions Which Attract Distinct EXO70 Subunits
Source: MDPI journal article supplement (doi:10.3390/ijms20153803), 2019-08-03
Supplement: s1 [file s1]

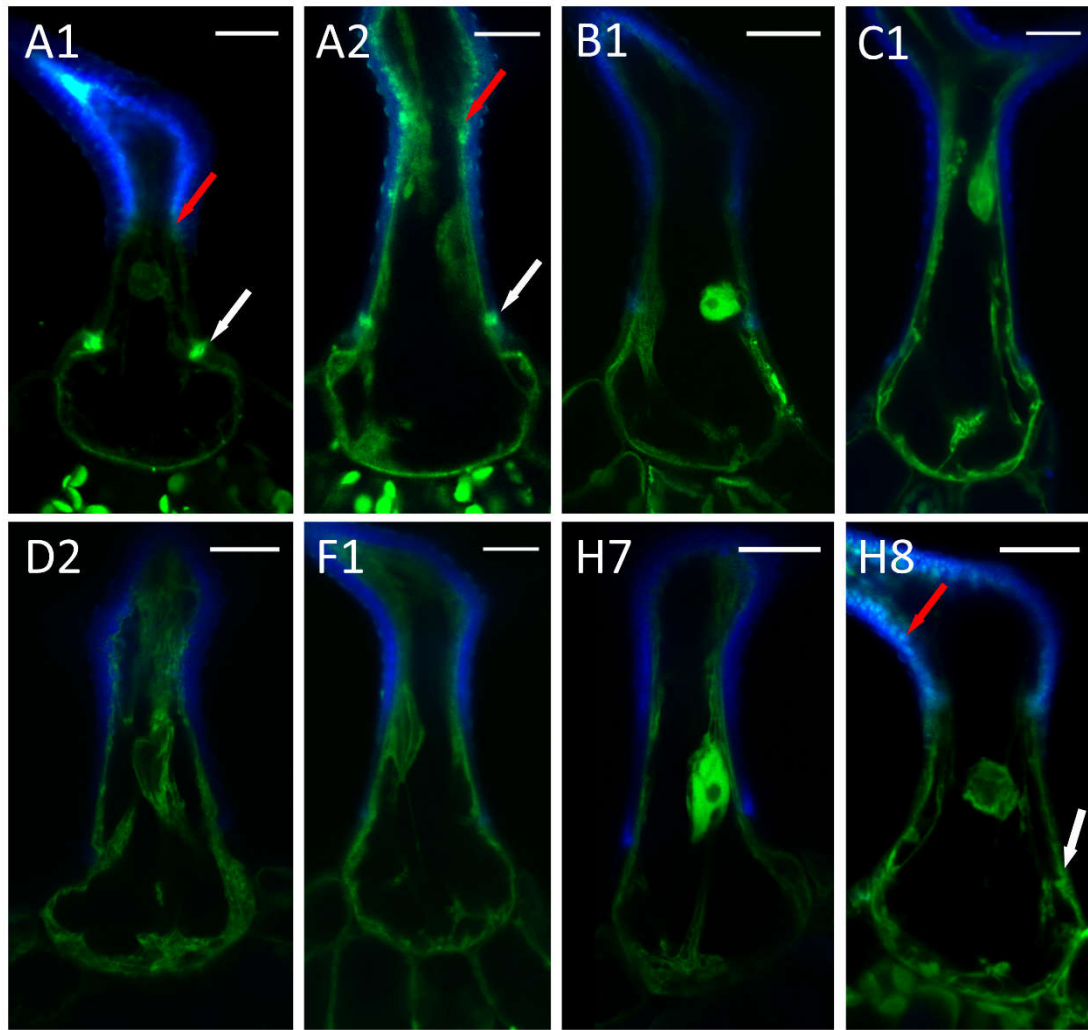

**Supplemental Figure S1.** Localization of different EXO70s in WT trichome: blue—cell wall autofluorescence, green—GFP, white arrows point at the Ortmannian ring, red arrows point at examples of apical domain accumulations; Scale bars = 20  $\mu\text{m}$ .

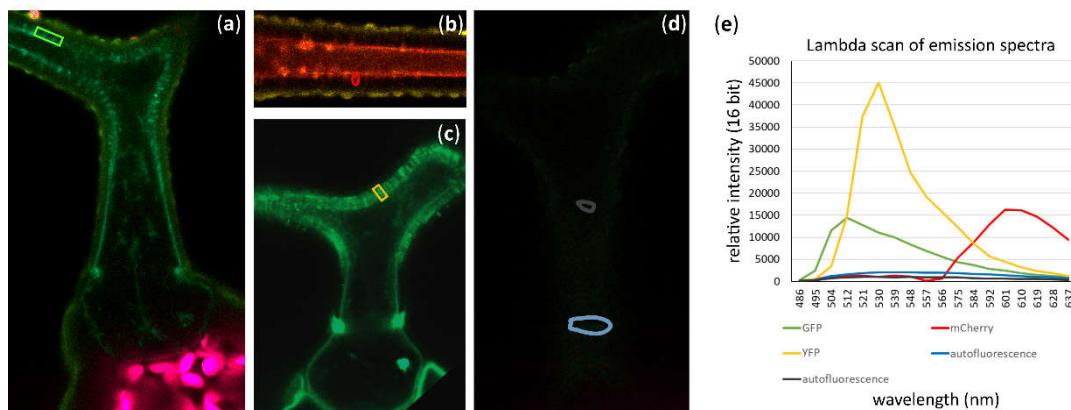

**Supplemental Figure S2.** Lambda scan controls of fluorescent markers entrapped in the SCW of WT trichome: (a) GFP-EXO70H4; (b) mCh-EXO70H4; (c) YFP-PA marker; (d) negative control, untransformed WT plant; (e) lambda scan of emission spectra; squares depict measured area; images are a projection of wavelength series, where each channel was given corresponding color; Scale bar = 20  $\mu\text{m}$ .

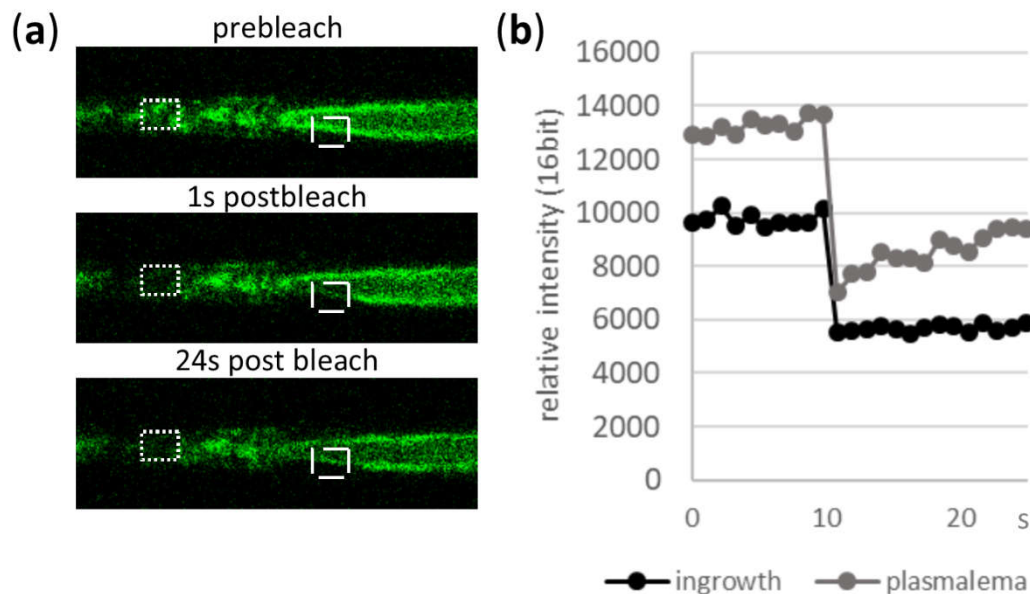

**Supplemental Figure S3.** FRAP of the PI4P marker in the active PM and intramural pockets: (a) PI4P marker in the mature trichome branch. Dotted rectangle represents the region with entrapped membranous pockets, dashed rectangle represents the active cytoplasm region. ; (b) Relative intensity of both regions (ingrowth corresponds to the dotted rectangle, PM to the dashed rectangle). Bleaching was performed 9 s after the beginning of the imaging.

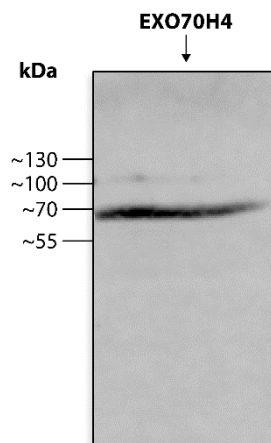

**Supplemental Figure S4.** Western blot analysis of N-terminally HA-tagged EXO70H4 protein expression and stability.

**Supplemental Table S1.** List of used primers.

|                                       |                                                                                                         |
|---------------------------------------|---------------------------------------------------------------------------------------------------------|
| EXO70A1 prom for                      | TTGTACAAACTTGAAAAATAACGAATAATCTTTCTGAGTTGAG                                                             |
| EXO70A1 prom rev                      | ATAGAAAAGTTGAAAATTACATTACTGGTTGATGGAAAG                                                                 |
| PKI_NES-GA5-F_Xba                     | ATATCTAGAAACTCAAATGAACTTGCCCTAAAACCTGCAGGGCTCGATATTA<br>ACAAGACCGAGGGTGCTGGTGCTGGTGCTGGTGCTGGTGCCGGCATG |
| Spo20-R_SpeI-int                      | ACCACTAGTCTTAGTGCGTCATCGAAC                                                                             |
| EXO70H4-forward                       | TTCCAGATTACGCTATGATGACGAGAGAAAAGC                                                                       |
| EXO70H4-reverse                       | TAGCGGCCGCTTAGGACATGGATTGC                                                                              |
| megaprimer with HA-tag and Kozak seq. | AAGTCGACGCCGCCACCATGTACCCATAC GATGTTCCAGATTACGCTATG                                                     |
